# Supplementary material for: D–A–D type chromophores with aggregation-induced emission and two-photon absorption: synthesis, optical characteristics and cell imaging
Source: Royal Society of Chemistry journal article supplement (doi:10.1039/c6tc00781c), 2016-01-01
Supplement: c6tc00781c1.pdf [file c6tc00781c1.pdf]

# D-A-D type chromophores with aggregation-induced emission and two-photon absorption: synthesis, optical characteristics and cell imaging

Ai-Xiang Ding, Hu-Jun Hao, Yong-Guang Gao, You-Di Shi, Quan Tang, and Zhong-Lin Lu<sup>\*</sup>

---

*Key Laboratory of Theoretical and Computational Photochemistry, Ministry of Education; College of Chemistry, Beijing Normal University,  
Xinjie Kouwai Street, Beijing 100875, China*

## Content

|                                                                                           |      |
|-------------------------------------------------------------------------------------------|------|
| 1. Tables and Figures for OPEF ( <b>Table S1-S2, Figure S1-S3</b> ) .....                 | 1-3  |
| 2. Tables and Figures for theoretical calculations ( <b>Figure S4-S5, Table S3</b> )..... | 3-4  |
| 3. Tables and Figures for AIE ( <b>Figure S6-S10, Table S4</b> ) .....                    | 4-6  |
| 4. Figures for TPEF ( <b>Figure S11</b> ) .....                                           | 6    |
| 5. Flow cytometric assay ( <b>Figure S12</b> ) .....                                      | 6    |
| 6. Cell localized study ( <b>Figure S13</b> ).....                                        | 7    |
| 7. Characteristic spectra for newly synthesized compounds ( <b>Figure S14-S35</b> ).....  | 7-18 |

# 1. Tables and Figures for OPEF

Table S1 The one-photon optical data of **1**, **2**, and **3** in various solvents <sup>a</sup>

| solvent | $\Delta f$ | 1                         |                           |                  |              |             |                           | 2                         |                  |              |             |                           |                           | 3                  |              |             |  |  |  |
|---------|------------|---------------------------|---------------------------|------------------|--------------|-------------|---------------------------|---------------------------|------------------|--------------|-------------|---------------------------|---------------------------|--------------------|--------------|-------------|--|--|--|
|         |            | $\lambda_{ab}(\text{nm})$ | $\lambda_{em}(\text{nm})$ | $\Delta\nu/10^3$ | $\Phi_f(\%)$ | $\tau$ (ns) | $\lambda_{ab}(\text{nm})$ | $\lambda_{em}(\text{nm})$ | $\Delta\nu/10^3$ | $\Phi_f(\%)$ | $\tau$ (ns) | $\lambda_{ab}(\text{nm})$ | $\lambda_{em}(\text{nm})$ | $\Delta\nu/10^3$   | $\Phi_f(\%)$ | $\tau$ (ns) |  |  |  |
|         |            | $(\text{cm}^{-1})$        |                           |                  |              |             |                           | $(\text{cm}^{-1})$        |                  |              |             |                           |                           | $(\text{cm}^{-1})$ |              |             |  |  |  |
| HEX     | ~ 0        | 415                       | 488                       | 3.65             | 2.9          | 0.86354     | n.d.                      | n.d.                      | N/A              | n.d.         | n.d.        | 407                       | 467                       | 3.2                | 1.0          | 0.54778     |  |  |  |
| TOL     | 0.014      | 418                       | 553                       | 5.91             | 4.0          | 1.25964     | 429                       | 584                       | 6.18             | 4.1          | 1.31737     | 402                       | 494                       | 4.63               | 1.1          | 0.60814     |  |  |  |
| EtOAc   | 0.201      | 418                       | 590                       | 7.00             | 3.9          | 1.22795     | 425                       | 604                       | 6.95             | 2.0          | 0.77832     | 399                       | 514                       | 5.2                | 1.1          | 0.61221     |  |  |  |
| THF     | 0.210      | 420                       | 592                       | 7.09             | 4.1          | 1.23467     | 430                       | 611                       | 6.89             | 2.0          | 0.74315     | 401                       | 516                       | 5.65               | 0.8          | 0.62329     |  |  |  |
| DCM     | 0.218      | 426                       | 611                       | 7.13             | 2.5          | 0.93382     | 430                       | 609                       | 6.84             | 1.1          | 0.68217     | 397                       | 528                       | 5.87               | 0.8          | 0.75276     |  |  |  |
| DMF     | 0.275      | 428                       | 617                       | 7.18             | 1.0          | 0.61353     | 431                       | 604                       | 6.59             | 0.7          | 0.61537     | 399                       | 547                       | 6.94               | 1.1          | 0.71406     |  |  |  |
| AN      | 0.306      | 421                       | 626                       | 7.75             | 0.6          | 0.59633     | 422                       | 615                       | 7.44             | 0.5          | 0.60274     | 394                       | 554                       | 6.91               | 1.0          | 0.66786     |  |  |  |

<sup>a</sup> Abbreviations:  $\lambda_{ab}$  = absorption maximum,  $\lambda_{em}$  = emission maximum,  $\Delta\nu$  = Stock's shift in cm<sup>-1</sup>,  $\Phi_F$  = fluorescence quantum yield,  $\tau$  = fluorescence lifetime, and n.d. = not detected.

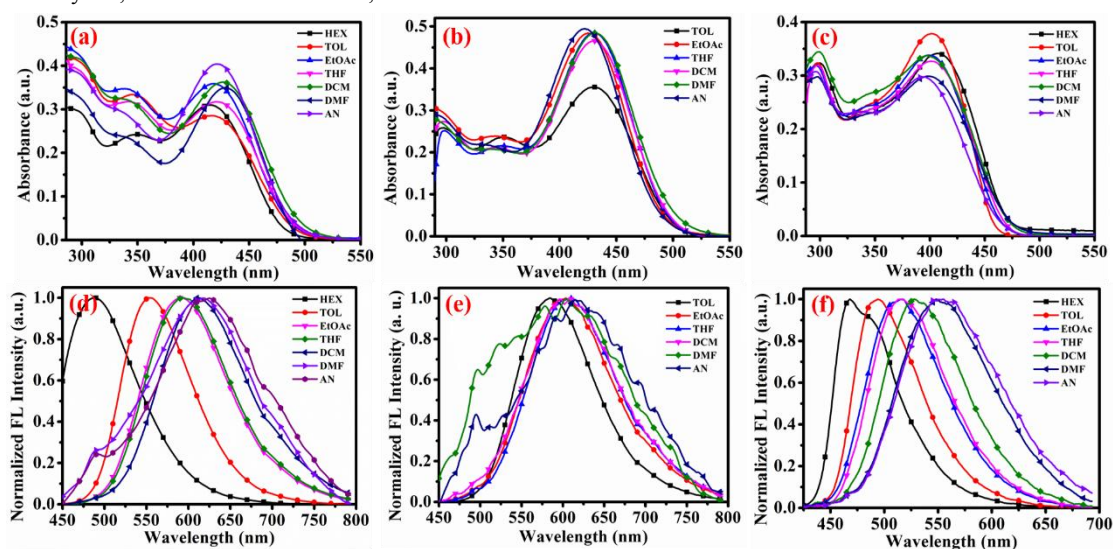

Figure S1 One-photon absorption spectra and excited fluorescence of **1** (a, d), **2** (b, e), and **3** (c, f) in various solvents with different polarity. Concentration = 10  $\mu$ M.

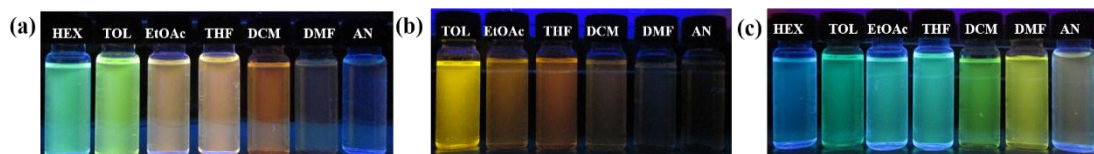

Figure S2 Photographs of **1** (a), **2** (b), and **3** (c) taken under UV 365 nm illumination in different solvents labeled on the top of the bottle. Concentration = 10  $\mu$ M.

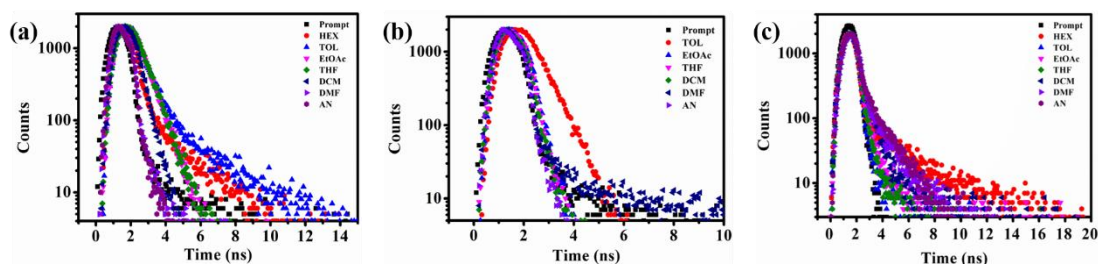

Figure S3 Fluorescence decay curves of **1** (a), **2** (b), and **3** (c) in different solvents. Concentration = 10  $\mu$ M.

| Solvent | 1      |          | 2      |          | 3      |          |
|---------|--------|----------|--------|----------|--------|----------|
|         | $k_f$  | $k_{nr}$ | $k_f$  | $k_{nr}$ | $k_f$  | $k_{nr}$ |
| HEX     | 0.0336 | 1.124    | N/A    | N/A      | 0.0183 | 1.807    |
| TOL     | 0.0318 | 0.762    | 0.0311 | 0.728    | 0.0181 | 1.626    |
| EtOAc   | 0.0318 | 0.783    | 0.0257 | 1.259    | 0.0180 | 1.615    |
| THF     | 0.0332 | 0.777    | 0.0269 | 1.319    | 0.0128 | 1.592    |
| DCM     | 0.0268 | 1.044    | 0.0161 | 1.450    | 0.0106 | 1.318    |
| DMF     | 0.0163 | 1.614    | 0.0114 | 1.614    | 0.0154 | 1.185    |
| AN      | 0.0101 | 1.667    | 0.0083 | 1.651    | 0.0150 | 1.482    |

$k_f$  and  $k_{nr}$  represent radiative rate and non-radiative rate, respectively.

3

Table S3 Experimental and calculated optical data for chromophores **1**, **2**, and **3**.

| Compd   | Transitions (S. no.) | Or <sup>a</sup> (Tc) <sup>b</sup> | E <sup>c</sup> (eV) | Cal. λ <sub>max</sub> <sup>d</sup> (nm) | Obs. λ <sub>max</sub> <sup>d</sup> (nm) | Character    |
|---------|----------------------|-----------------------------------|---------------------|-----------------------------------------|-----------------------------------------|--------------|
| TPEOM-1 | 1                    | 225 (H) → 226 (L)                 | 3.013               | 415                                     | 429                                     | π → π* (ICT) |
|         | 2                    | 224 (H-1) → 226 (L)               | 3.664               | 338                                     | 346                                     | π → π* (ICT) |
|         | 3                    | 224 (H-1) → 227 (L+1)             | 3.855               | 302                                     | 294                                     | π → π*       |
| TPEOM-2 | 1                    | 209 (H) → 210 (L)                 | 2.994               | 415                                     | 429                                     | π → π* (ICT) |
|         | 2                    | 208 (H-1) → 210 (L)               | 3.747               | 331                                     | 351                                     | π → π* (ICT) |
|         | 3                    | 207 (H-1) → 211 (L+1)             | 3.901               | 306                                     | 296                                     | π → π*       |
| TPEOM-3 | 1                    | 201 (H) → 202 (L)                 | 3.005               | 413                                     | 402                                     | π → π* (ICT) |
|         | 2                    | 200 (H-1) → 202 (L)               | 3.770               | 329                                     | 345                                     | π → π* (ICT) |
|         | 3                    | 200 (H-1) → 203 (L+1)             | 3.980               | 312                                     | 298                                     | π → π*       |

(a) Orbitals involved in the excitations; (b) Transition coefficients; (c) Excitation energies (eV); (d) Calculated peak position of the longest absorption; (e) Observed peak position of the longest absorption.

### 3. Tables and Figures for AIE

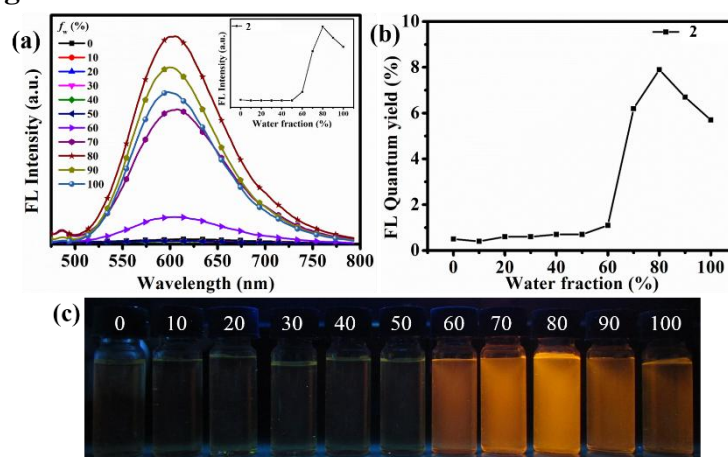

Figure S6 (a) FL spectra of **2** in the AN/Water mixtures,  $\lambda_{\text{ex}} = 420$  nm; (b) Plots of FL quantum yield vs water fraction; (c) Photographs taken under UV 365 nm illumination, the number labeled on the top of the bottle represent the water fraction (%). Inset: The FL intensity as a function vs the water fraction. *Concentration* = 10  $\mu\text{M}$ .

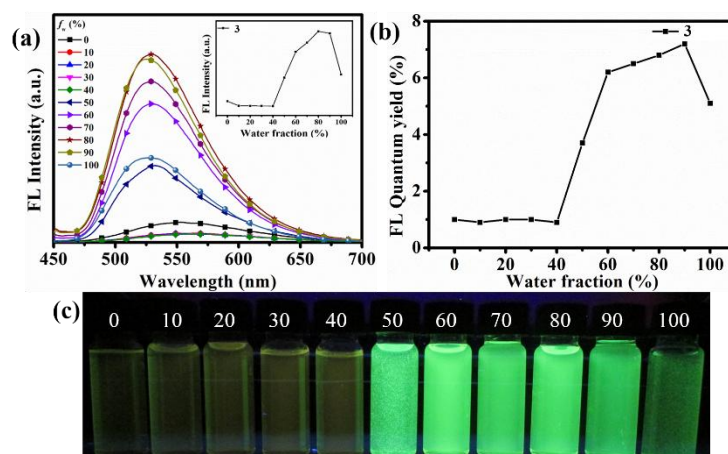

Figure S7 (a) FL spectra of **3** in the AN/Water mixtures,  $\lambda_{\text{ex}} = 420$  nm; (b) Plots of FL quantum yield vs water fraction; (c) Photographs taken under UV 365 nm illumination, the number labeled on the top of the bottle represent the water fraction (%). Inset: The FL intensity as a function vs the water fraction. *Concentration* = 10  $\mu\text{M}$ .

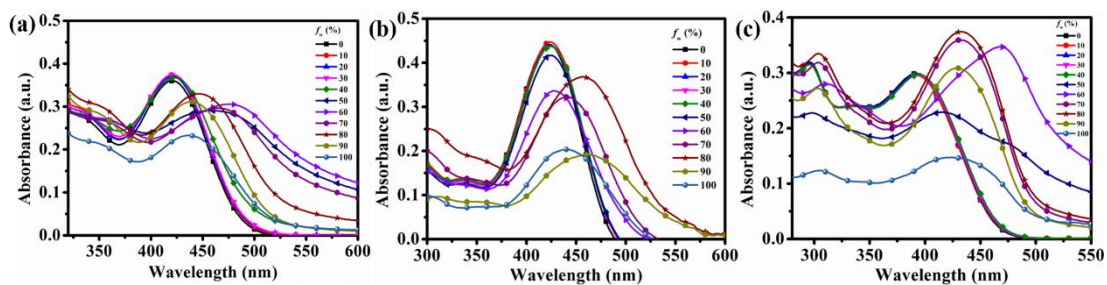

Figure S8 UV-Vis spectra of **1** (a), **2** (b), and **3** (c) in the AN/water mixtures with different water fractions, *Concentration* = 10  $\mu$ M.

Table S4 Average diameter and PDI of the chromophores in AN/water mixtures with different water fraction<sup>a</sup>

| $f_w(\%)$ | <b>1</b> |       | <b>2</b> |       | <b>3</b> |       |
|-----------|----------|-------|----------|-------|----------|-------|
|           | $d$ (nm) | PDI   | $d$ (nm) | PDI   | $d$ (nm) | PDI   |
| 60        | 579.8    | 0.098 | 211.4    | 0.089 | 360.6    | 0.037 |
| 80        | 303.4    | 0.254 | 507.2    | 0.005 | 289.4    | 0.006 |
| 100       | 1533.8   | 0.367 | 2626.7   | 0.526 | 176.5    | 0.345 |

<sup>a</sup> Abbreviations:  $d$  = average diameter, PDI = polydispersity index

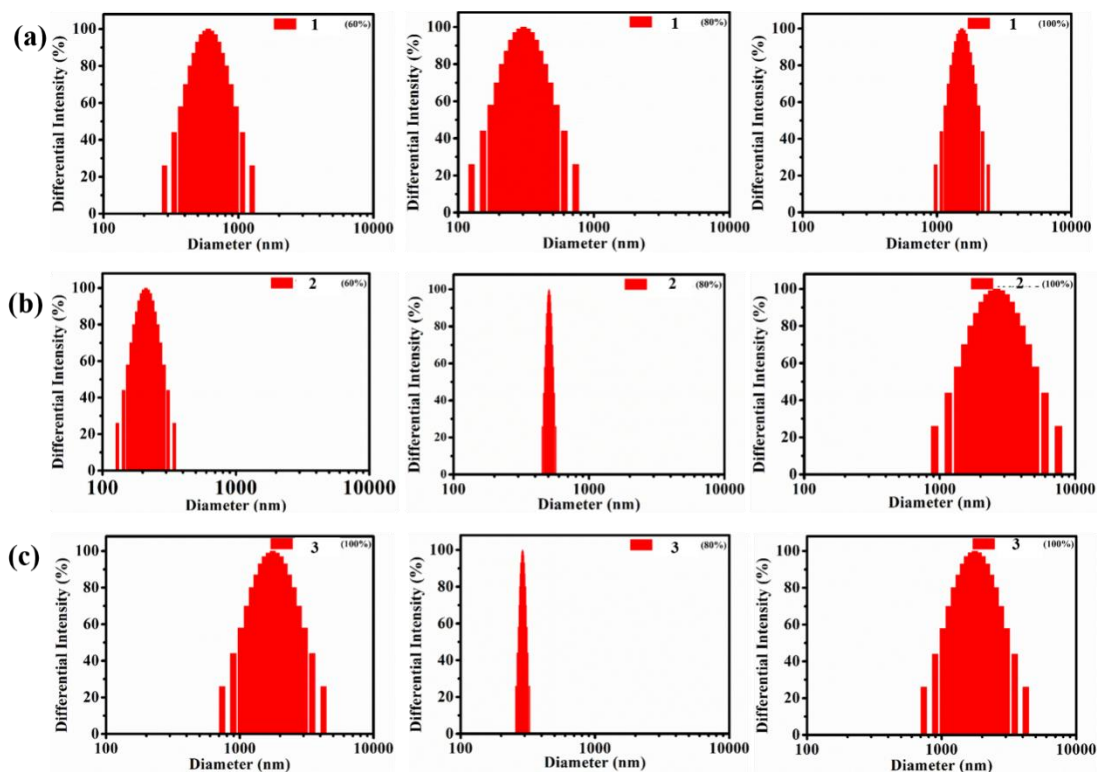

Figure S9 Particle size distributions of **1** (a), **2** (b) and **3** (c) in AN/water mixtures with  $f_w$  = 60%, 80% and 100%. *Concentration* = 10  $\mu$ M.

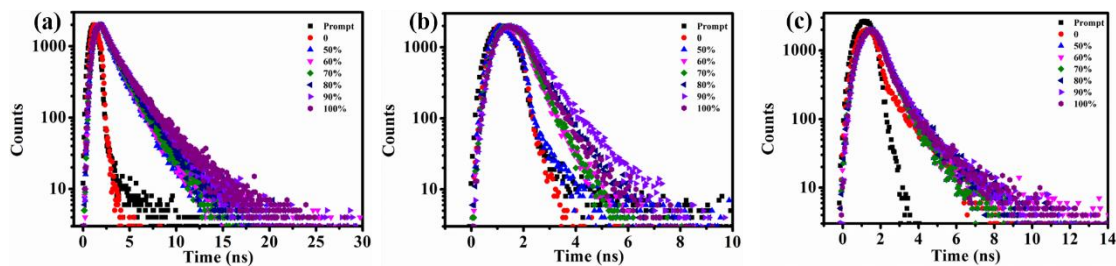

Figure S10 FL lifetime profiles of **1** (a), **2** (b), and **3** (c) in pure and AN/water mixtures with varying  $f_w$  from 50 ~ 100%. *Concentration* = 10  $\mu$ M.

#### 4. Figures for TPEF

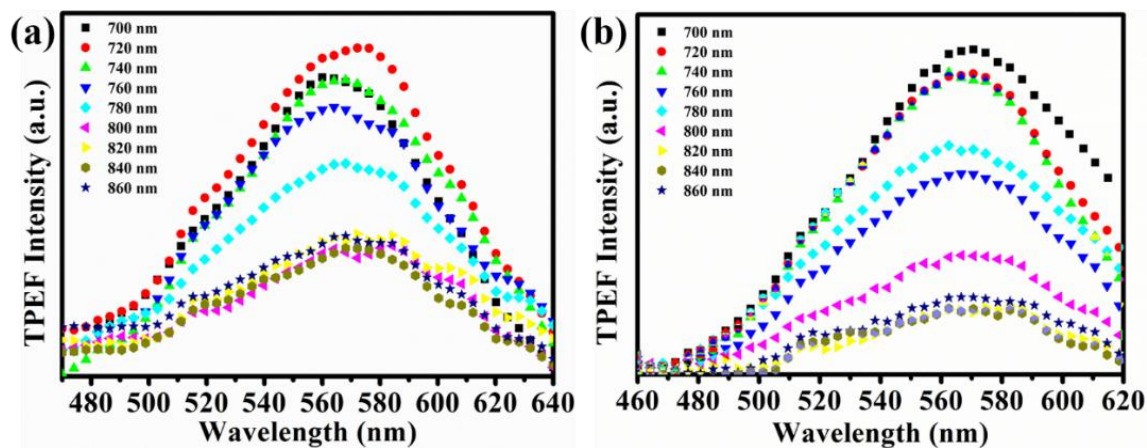

Figure S11 TPEF spectra of chromophores **1** (a) and **2** (b) in toluene pumped by femto-second laser at 300 mW under varying excitation energies from 700-860 nm. *Concentration* = 1 mM.

#### 5. Flow cytometric assay

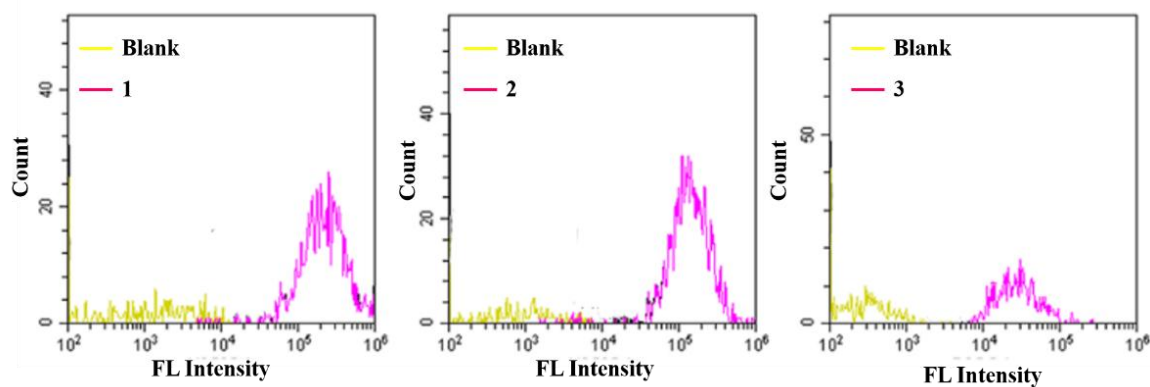

Figure S12 Flow cytometric profiles of HpeG2 cells incubated with **1**, **2** and **3** for 4 h. [Dyes] = 10  $\mu$ M.

## 6. Cell localized study

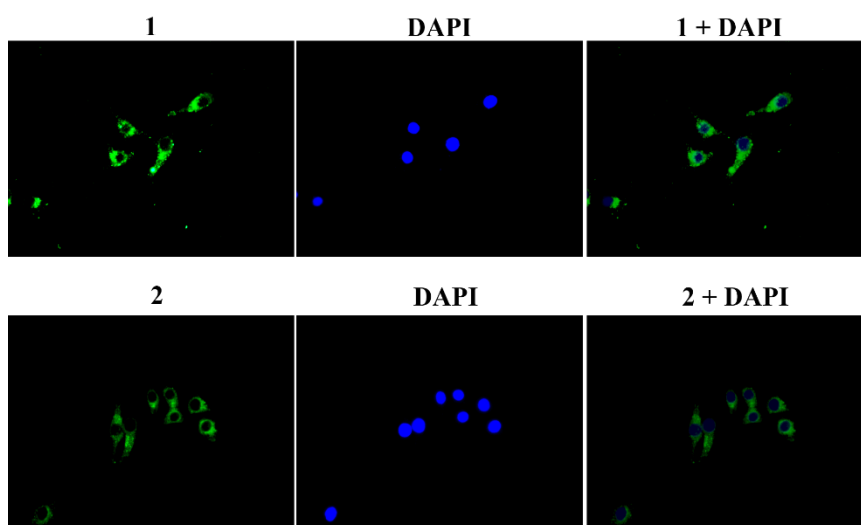

Figure S13 CLSM images of HpeG2 cells after 4 h incubation with DPAI (1 mg/mL) and chromophores (10  $\mu$ M).

## 6. Characteristic spectra for newly synthesized compounds

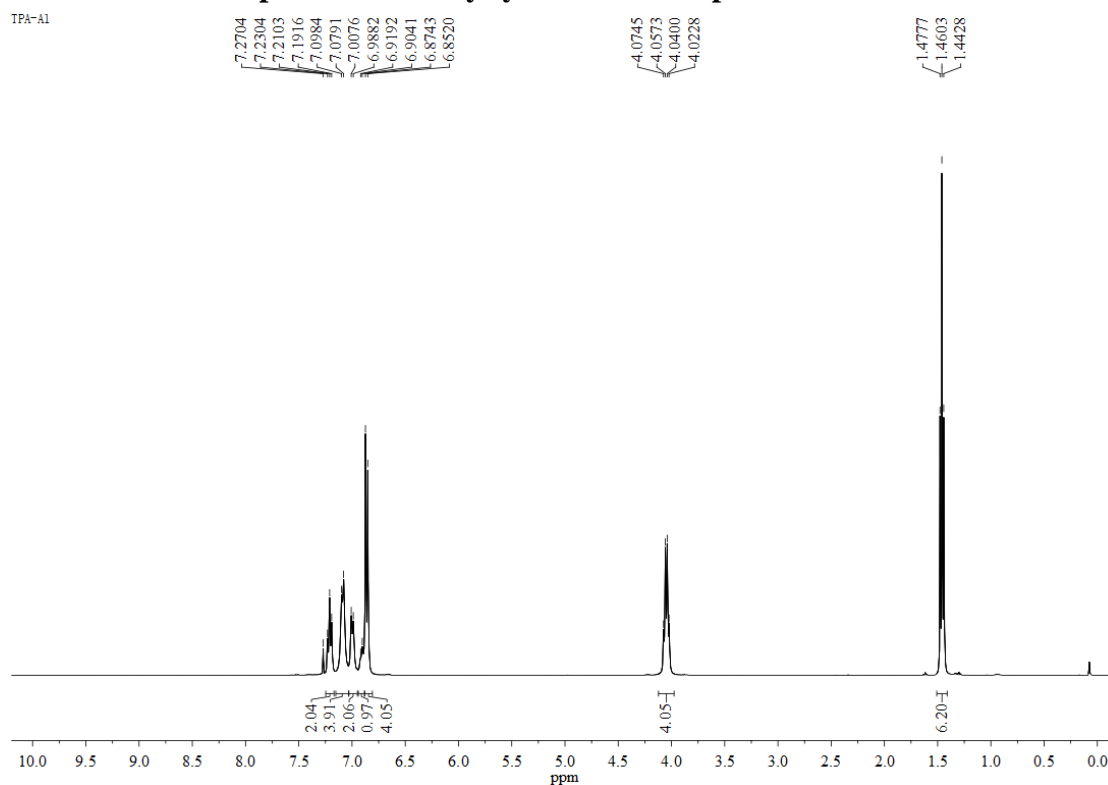

Figure S14  $^1\text{H}$  NMR spectrum of compound **4** ( $\text{CDCl}_3$ ).

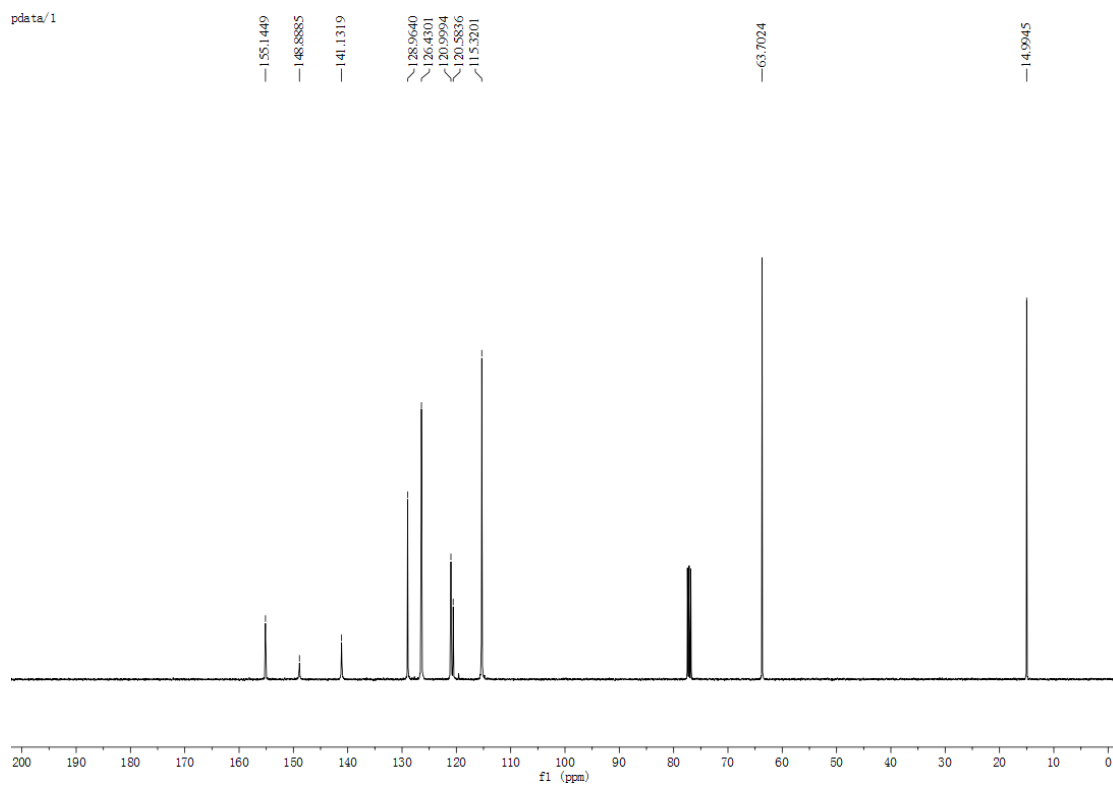

Figure S15  $^{13}\text{C}$  NMR spectrum of compound **4** ( $\text{CDCl}_3$ ).

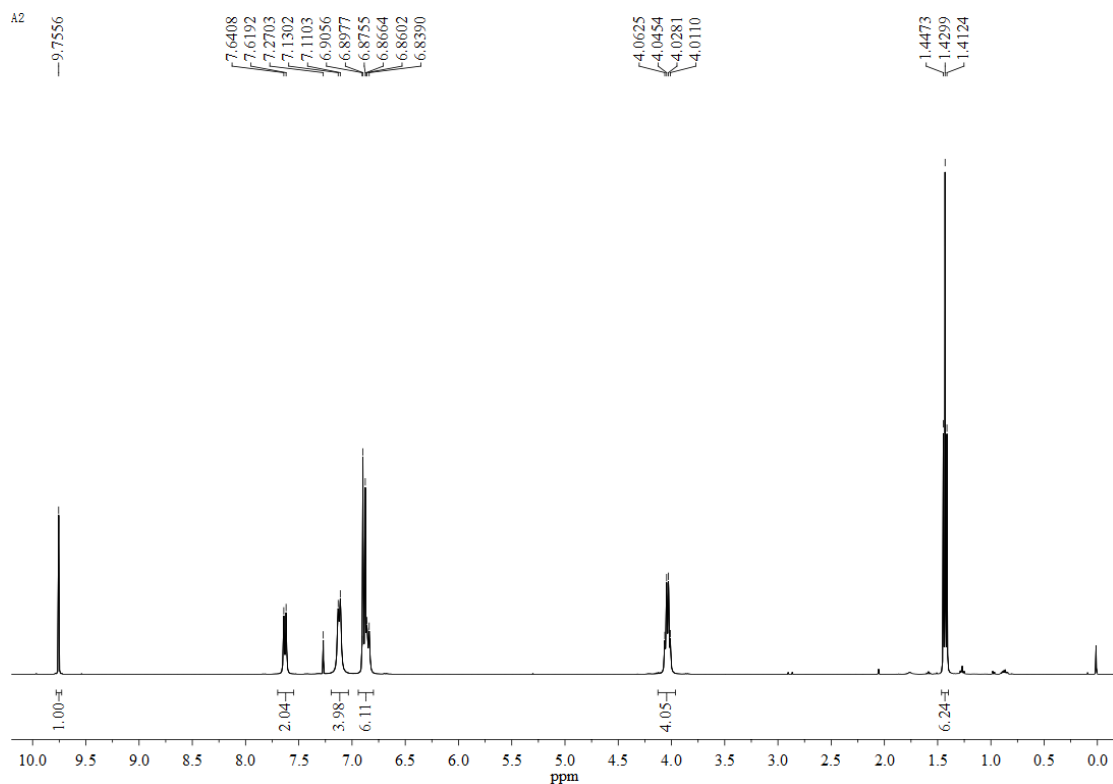

Figure S16  $^1\text{H}$  NMR spectrum of compound **7** ( $\text{CDCl}_3$ ).

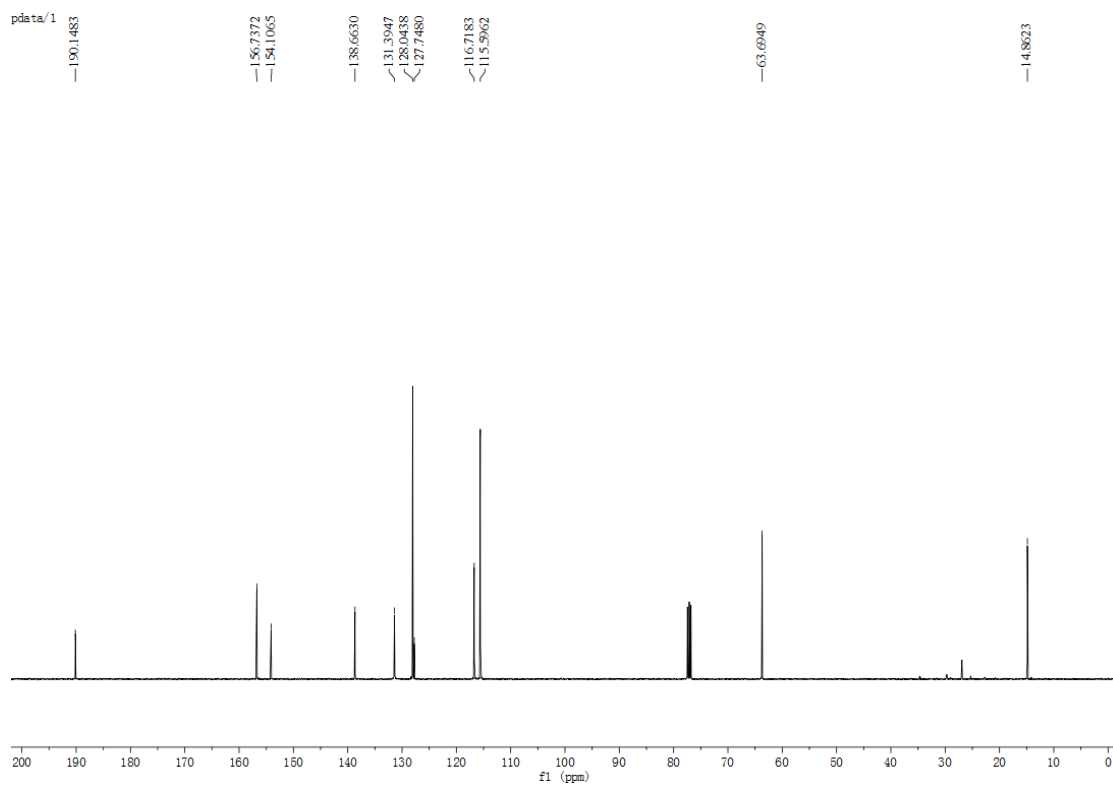

Figure S17  $^{13}\text{C}$  NMR spectrum of compound **7** ( $\text{CDCl}_3$ ).

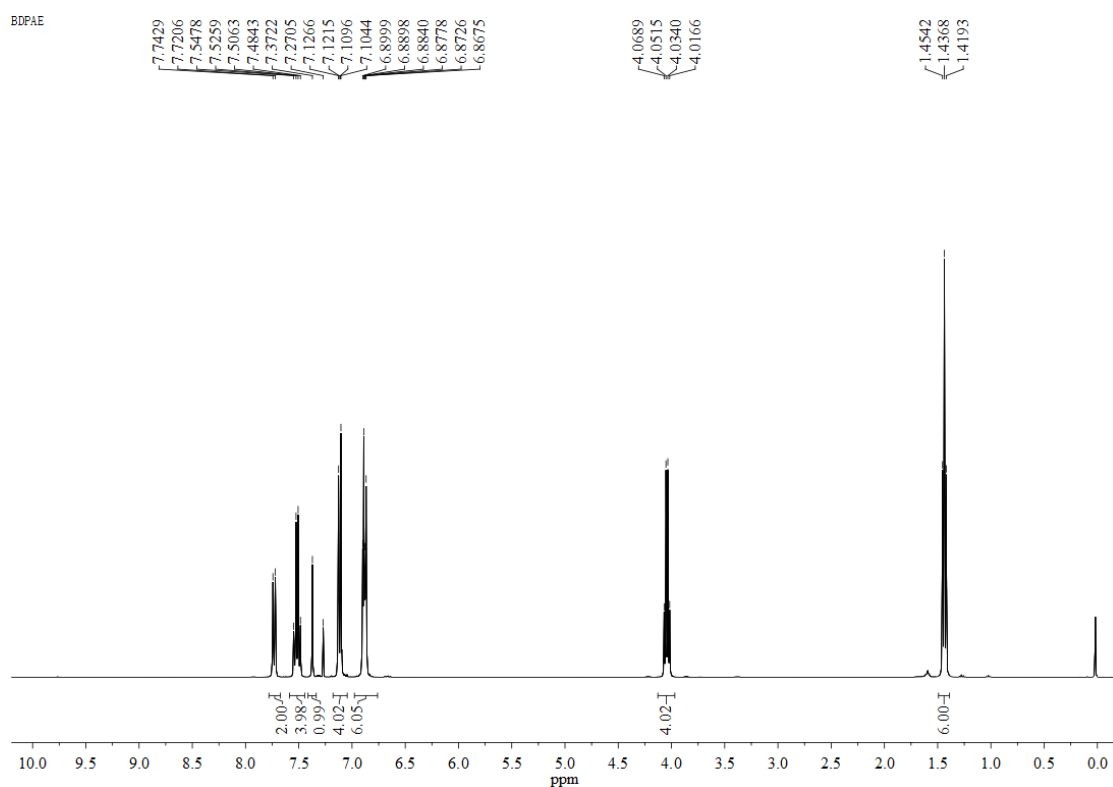

Figure S18  $^1\text{H}$  NMR spectrum of compound **10** ( $\text{CDCl}_3$ ).

BDPAE-13C

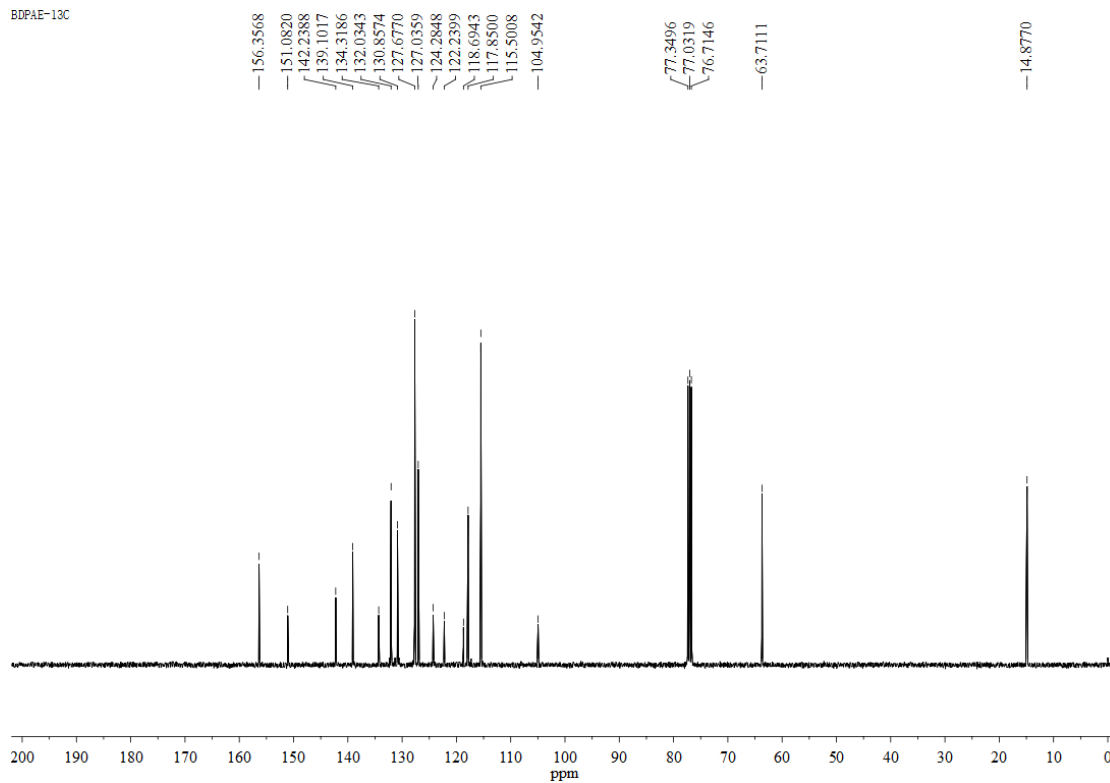Figure S19  $^{13}\text{C}$  NMR spectrum of compound **10** ( $\text{CDCl}_3$ ).

BDPAM

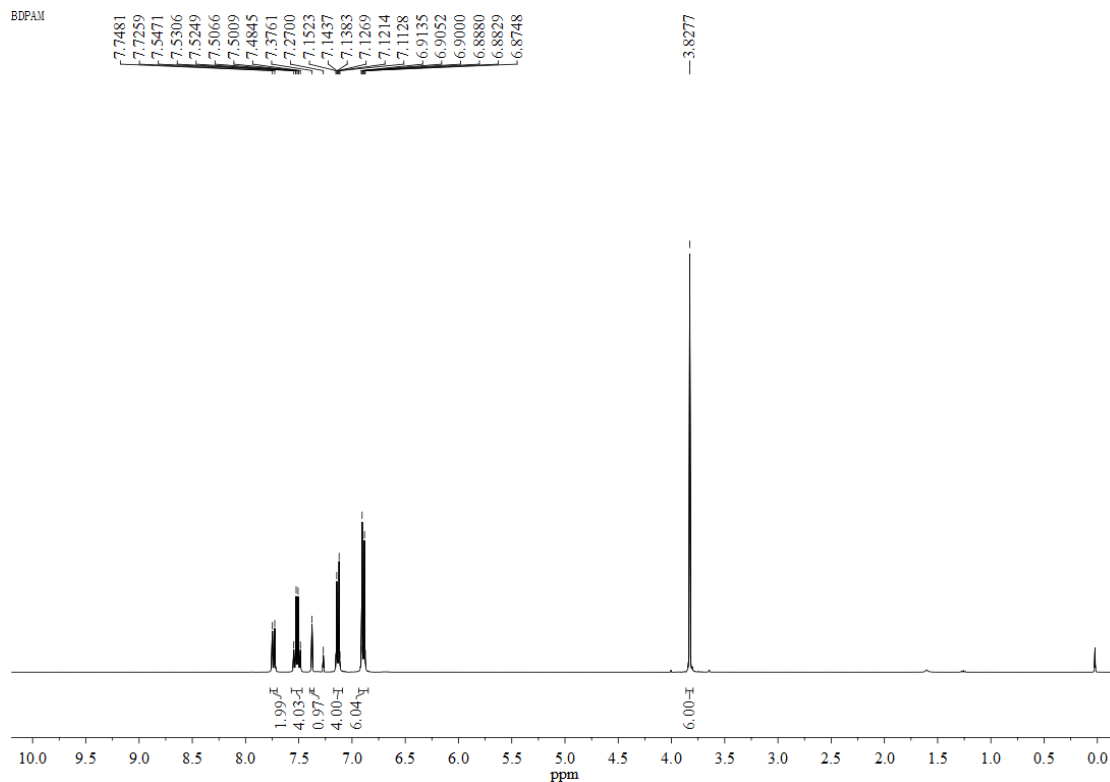Figure S20  $^1\text{H}$  NMR spectrum of compound **11** ( $\text{CDCl}_3$ ).

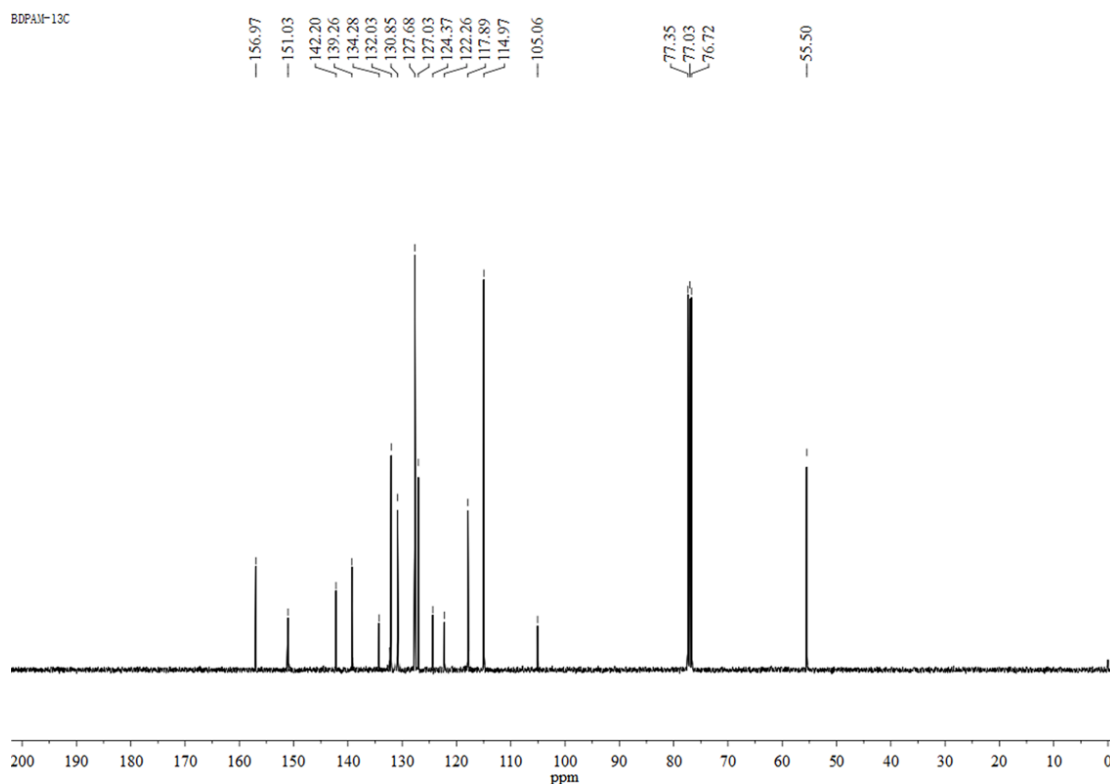

Figure S21  $^{13}\text{C}$  NMR spectrum of compound **11** ( $\text{CDCl}_3$ ).

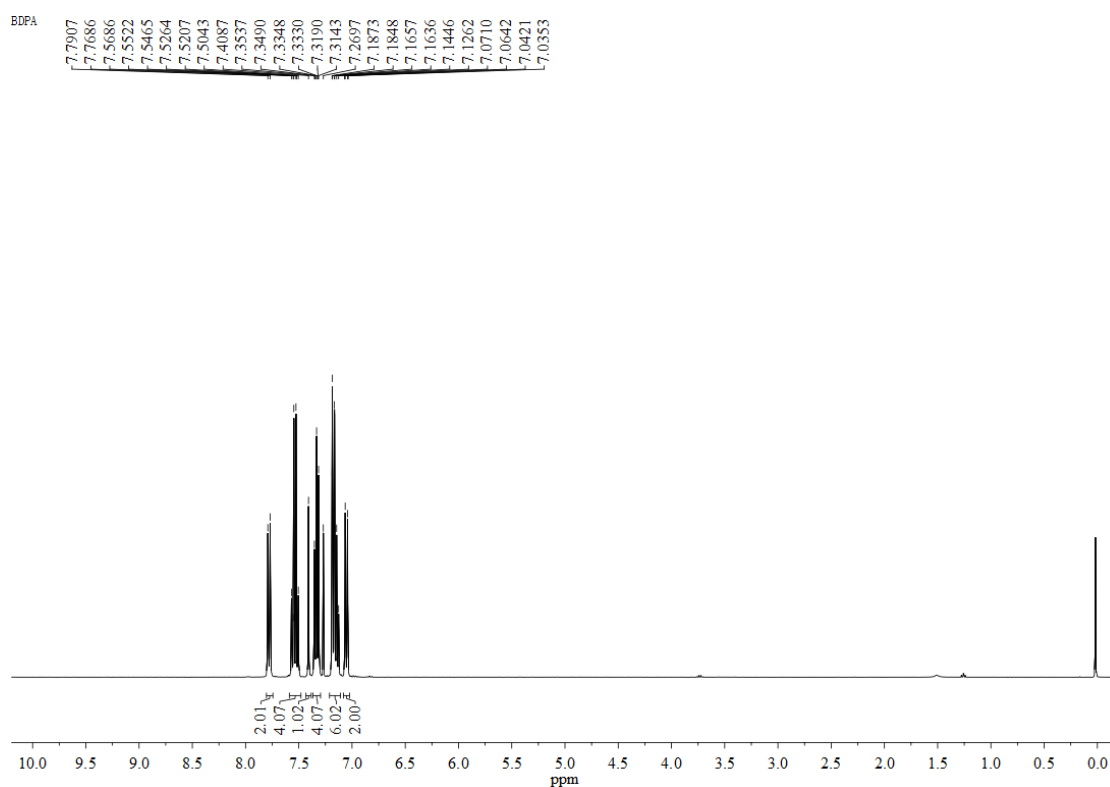

Figure S22  $^1\text{H}$  NMR spectrum of compound **12** ( $\text{CDCl}_3$ ).

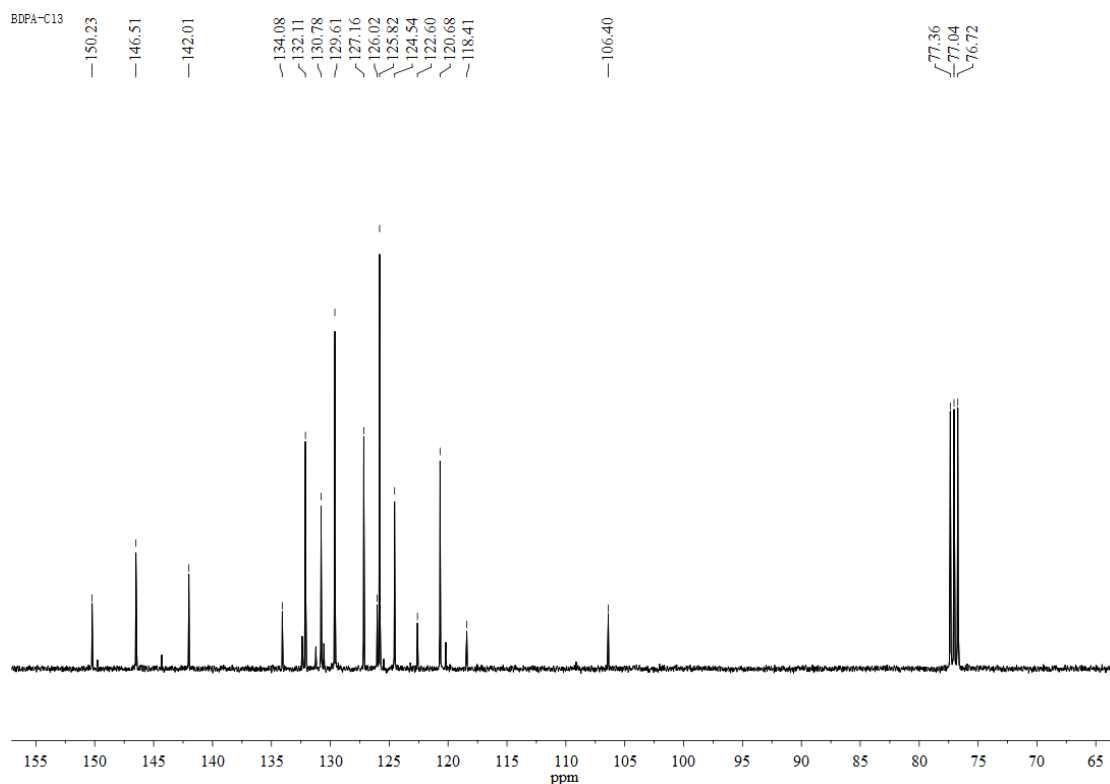

Figure S23  $^{13}\text{C}$  NMR spectrum of compound **12** ( $\text{CDCl}_3$ ).

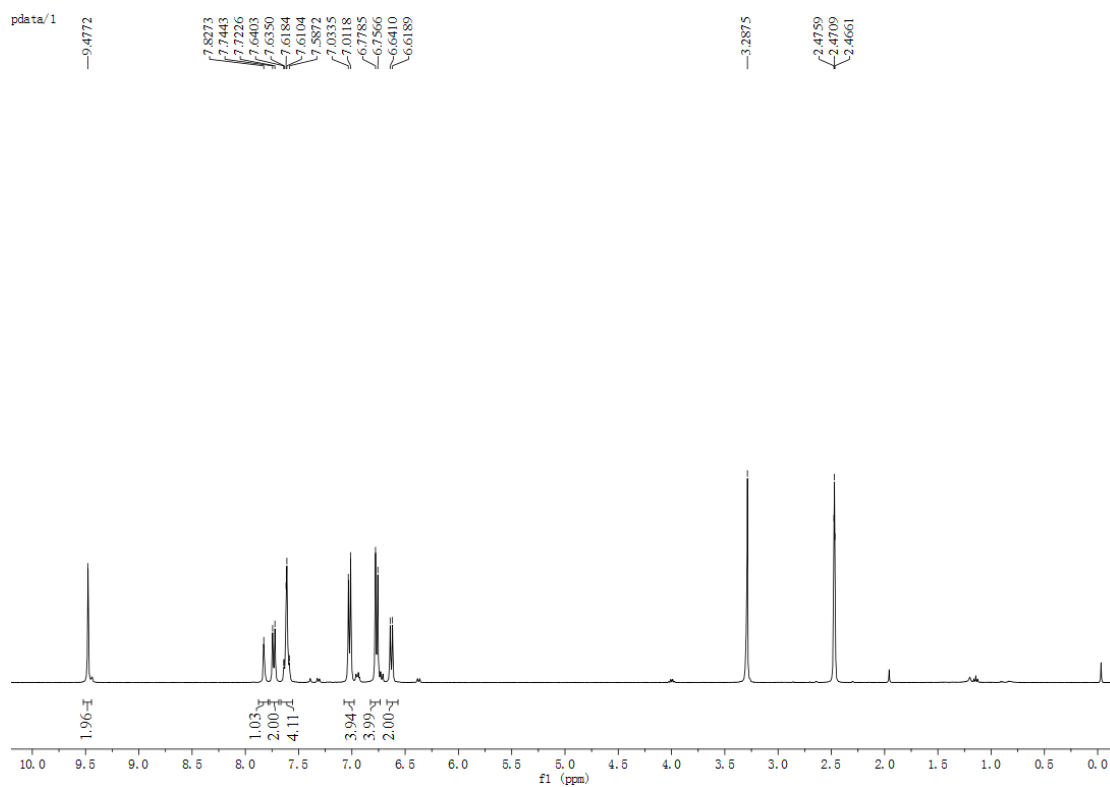

Figure S24  $^1\text{H}$  NMR spectrum of compound **13** ( $\text{DMSO}-d_6$ ).

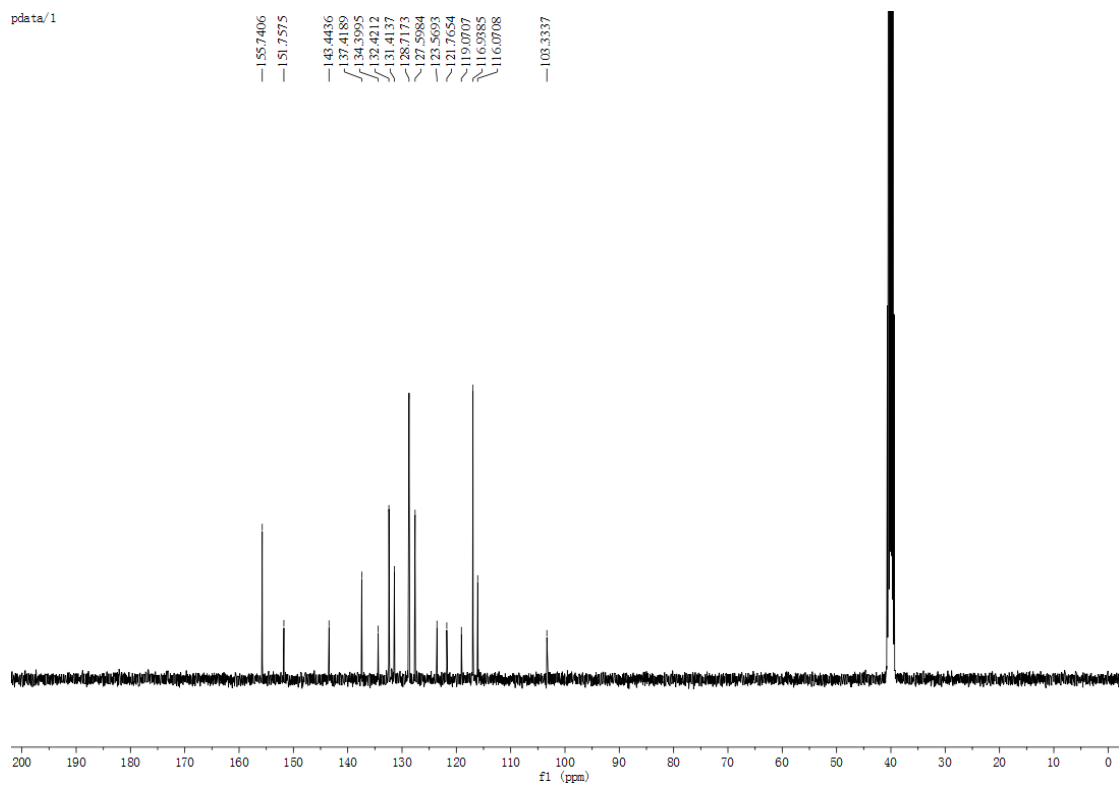

Figure S25  $^{13}\text{C}$  NMR spectrum of compound **13** ( $\text{DMSO}-d_6$ ).

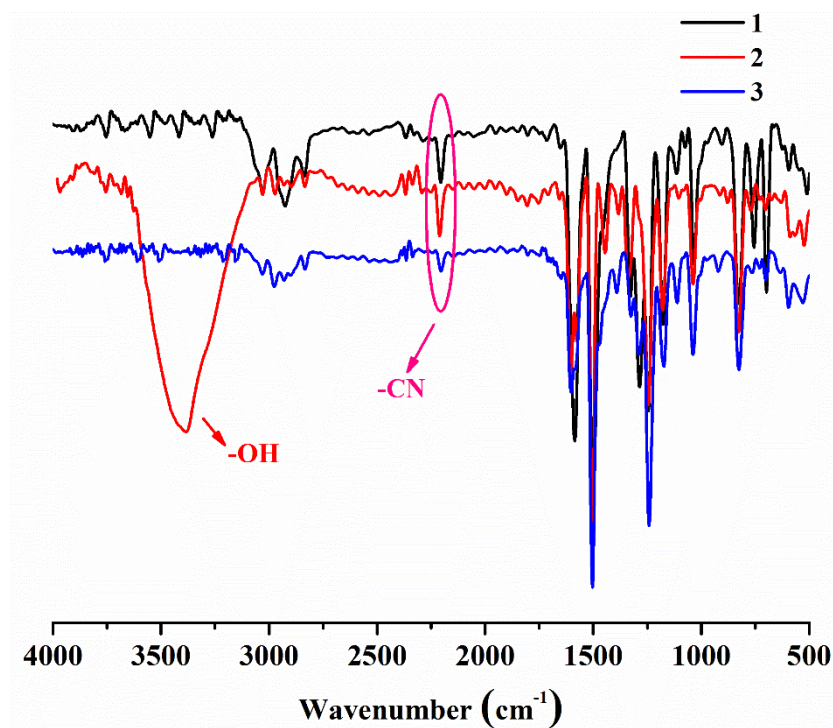

Figure S26 FT-IR spectra of chromophores **1** ~ **3**.

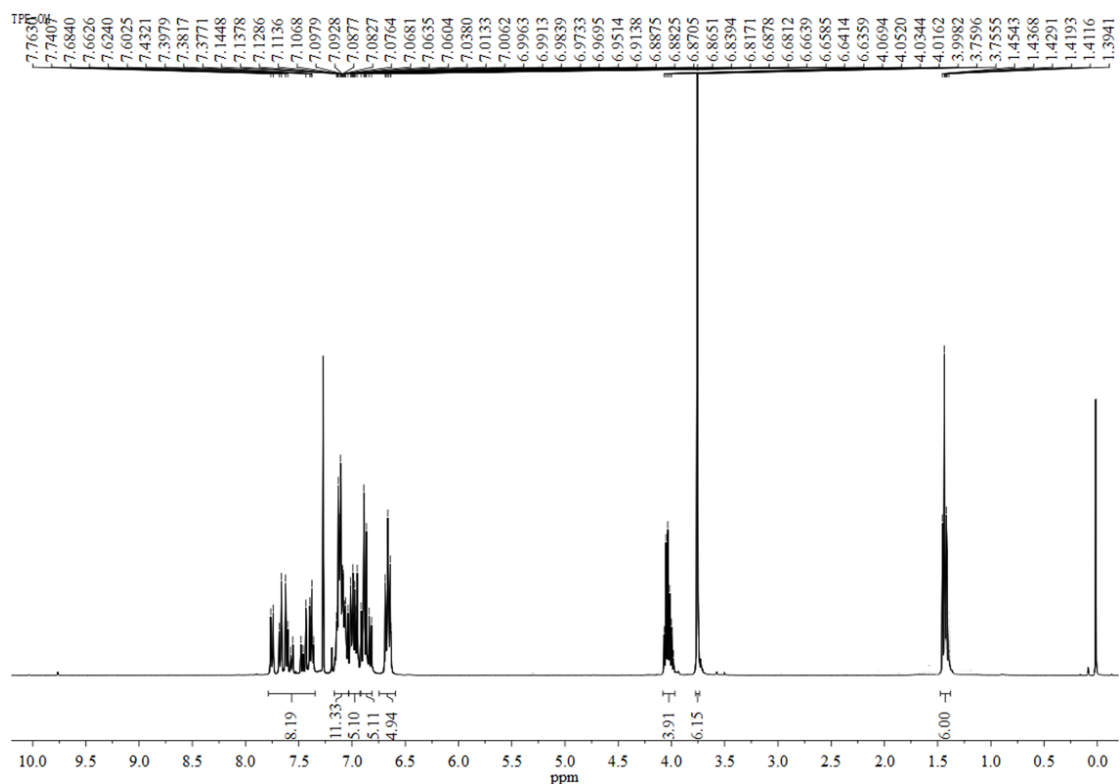

Figure S27  $^1\text{H}$  NMR spectrum of chromophore **1** ( $\text{CDCl}_3$ ).

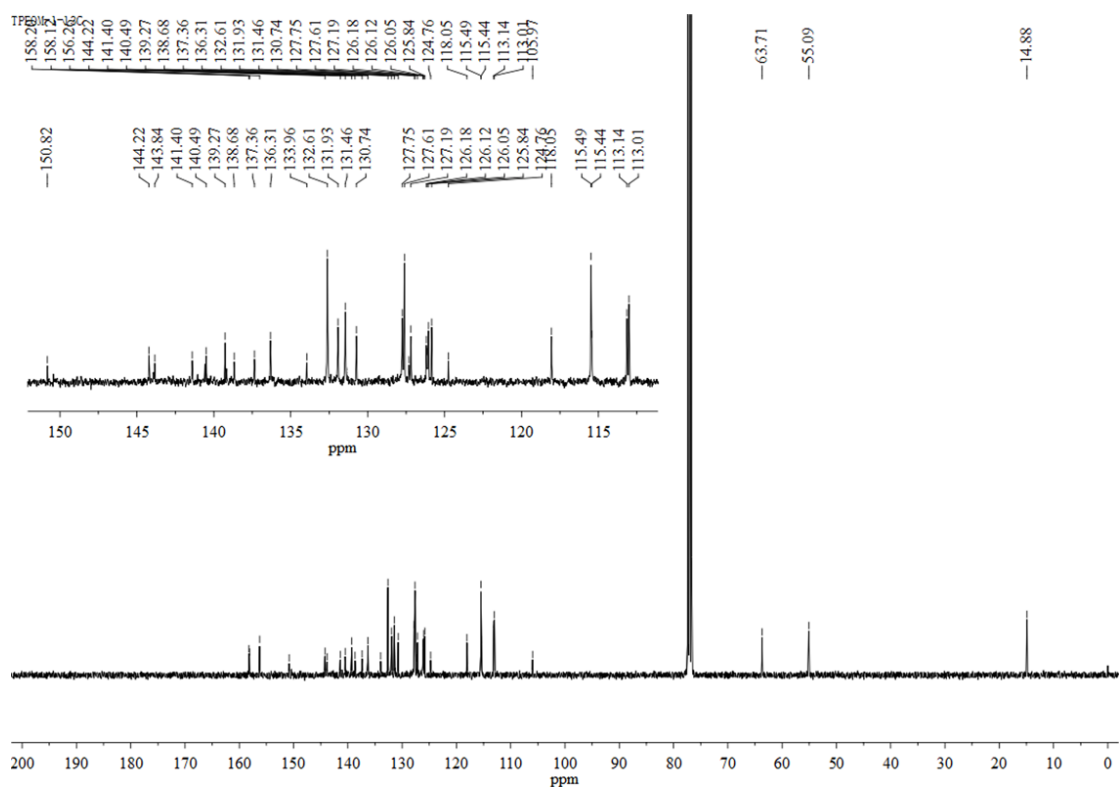

Figure S28  $^{13}\text{C}$  NMR spectrum of chromophore **1** ( $\text{CDCl}_3$ ).

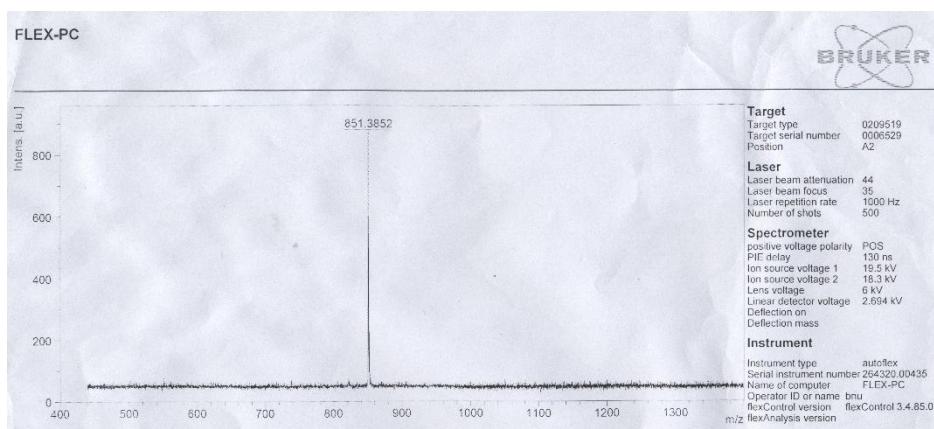

Figure S29 MALDI-TOF spectrum of chromophore **1**.

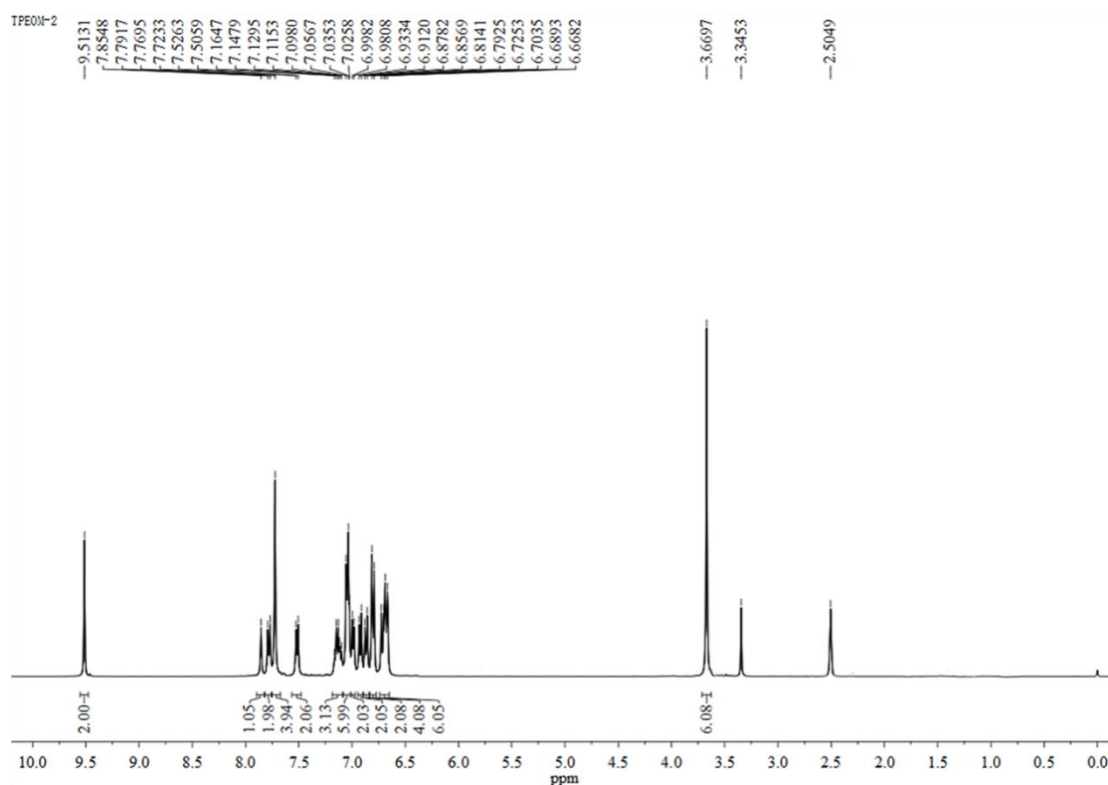

Figure S30  $^1\text{H}$  NMR spectrum of chromophore **2** ( $\text{DMSO}-d_6$ ).

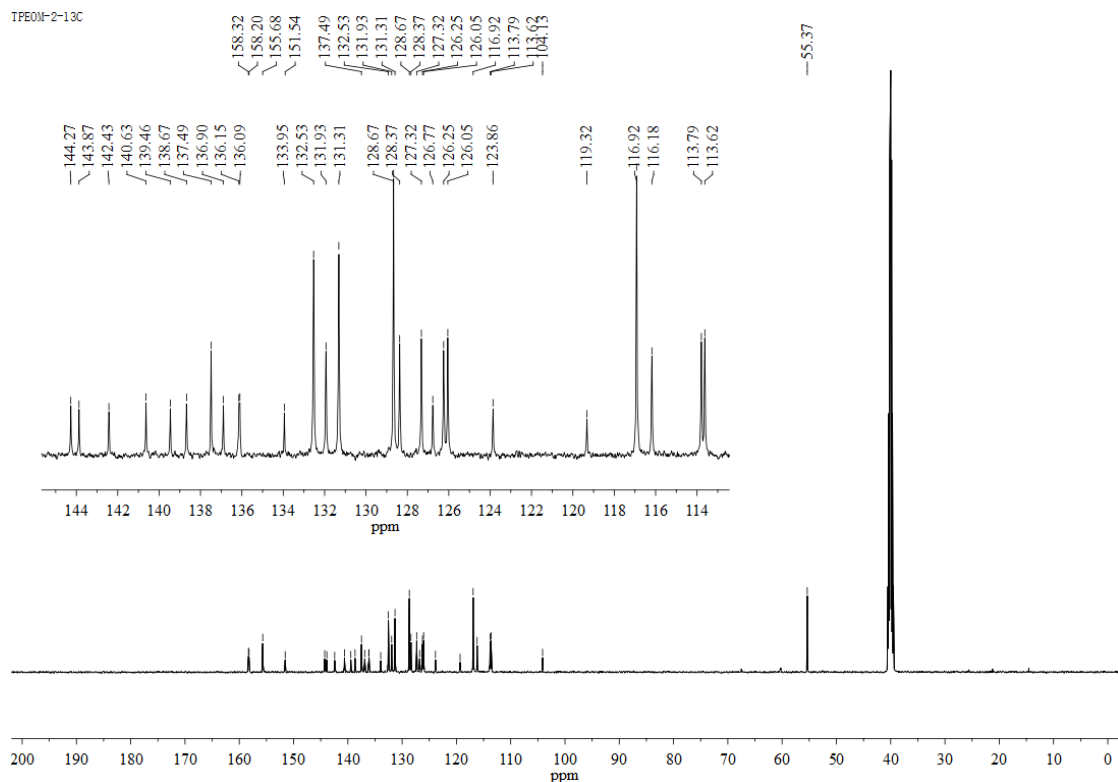

Figure S31  $^{13}\text{C}$  NMR spectrum of chromophore **2** ( $\text{DMSO}-d_6$ ).

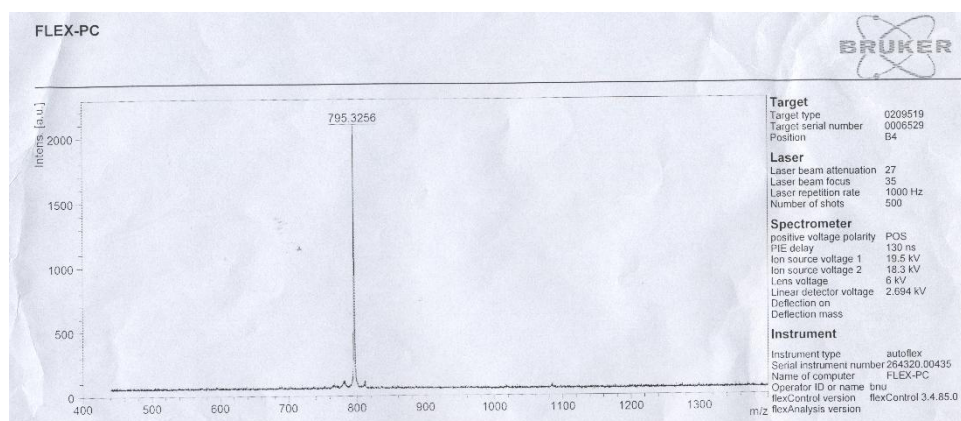

Figure S32 MALDI-TOF spectrum of chromophore **2**.

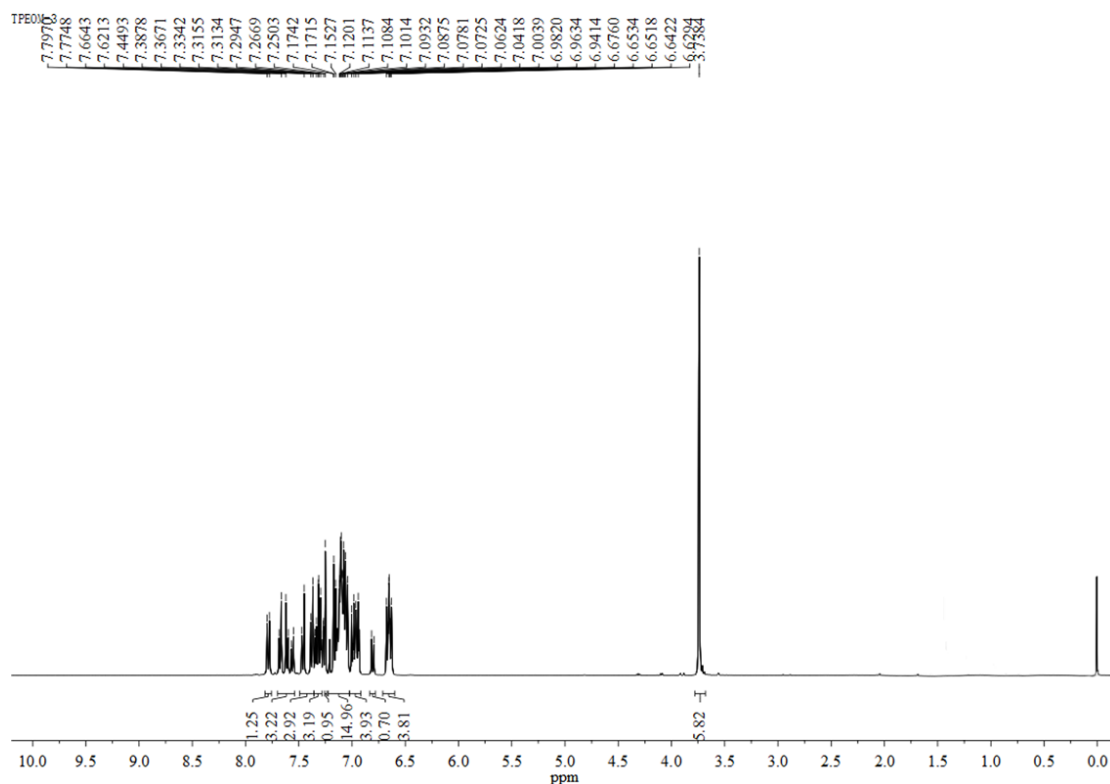

Figure S33  $^1\text{H}$  NMR spectrum of chromophore **3** ( $\text{CDCl}_3$ ).

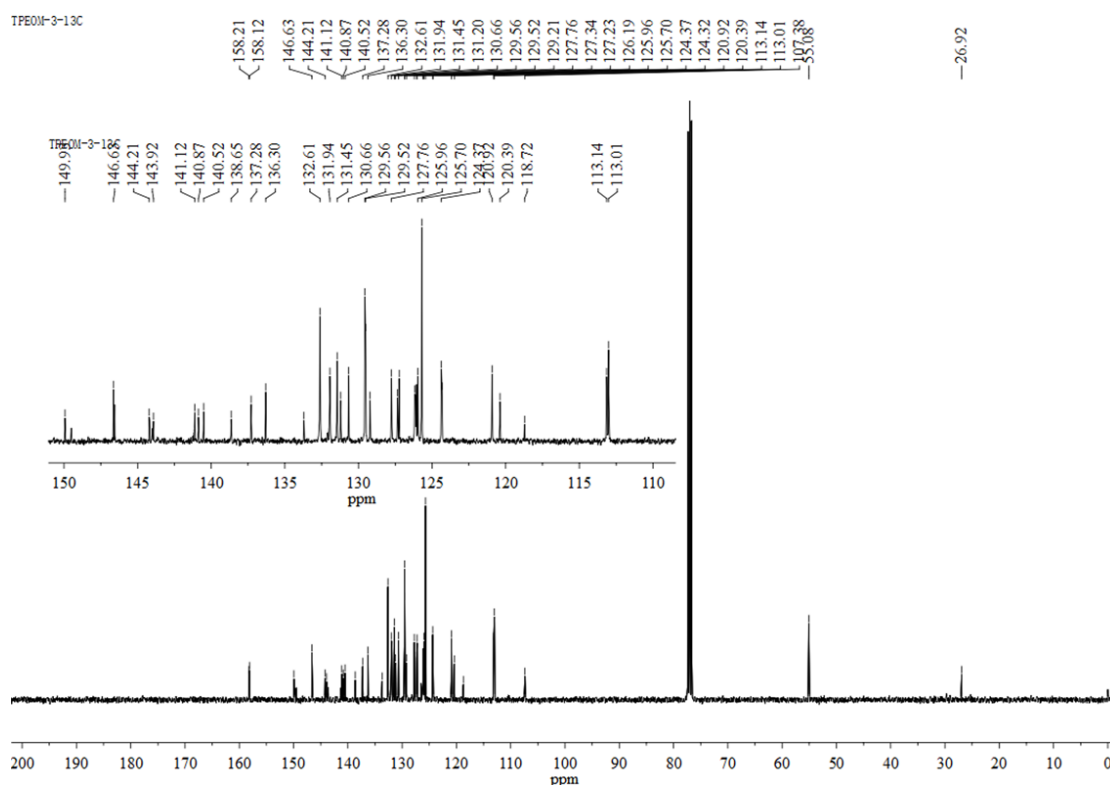

Figure S34  $^{13}\text{C}$  NMR spectrum of chromophore **3** ( $\text{CDCl}_3$ ).

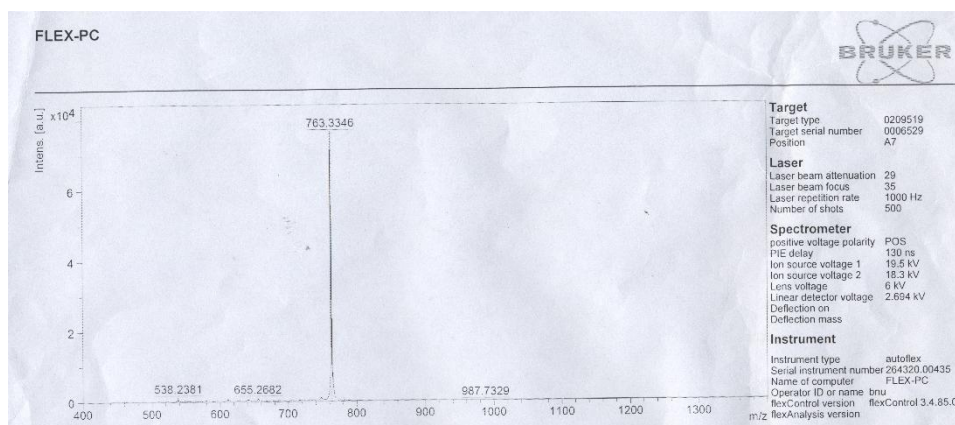

Figure S35 MALDI-TOF spectrum of chromophore **3**.
